# Supplementary material for: Genomic Features, Comparative Genomic Analysis, and Antimicrobial Susceptibility Patterns of Chryseobacterium arthrosphaerae Strain ED882-96 Isolated in Taiwan
Source: PubMed Central journal article supplement (PMC6523182; doi:10.3390/genes10040309), 2019-04-20
Supplement: genes-10-00309-s001.pdf [file genes-10-00309-s001.pdf]

# Genomic Features, Comparative Genomic Analysis, and Antimicrobial Susceptibility Patterns of *Chryseobacterium arthrosphaerae* Strain ED882-96 Isolated in Taiwan

Chih-Yu Liang, Chih-Hui Yang, Chung-Hsu Lai, Yi-Han Huang and Jiun-Nong Lin

**Table S1.** Primers and protocols for amplification and sequencing conditions used in this study.

| Primer                                         | Sequence (5' to 3' )                  | Amplicon Size (bp) | GenBank Accession No. or Reference |
|------------------------------------------------|---------------------------------------|--------------------|------------------------------------|
| PCR of 16S rRNA                                |                                       |                    |                                    |
| 8f                                             | CACGGATCCAGACTTTGAT(C/T)(A/C)TGGCTCAG | 1498               | Reference 1                        |
| 1512r                                          | GTGAAGCTTACGG(C/T)TAGCTTGTTACGACTT    |                    |                                    |
| Sequencing of 16S rRNA                         |                                       |                    |                                    |
| 8f                                             | CACGGATCCAGACTTTGAT(C/T)(A/C)TGGCTCAG |                    | Reference 1<br>This study          |
| 534r                                           | ATTACCGCGGCTGCTGG                     |                    |                                    |
| 534f                                           | CCAGCAGCCGCGGTAAT                     |                    |                                    |
| 968f                                           | AACGCGAAGAACCTTAC                     |                    |                                    |
| 1512r                                          | GTGAAGCTTACGG(C/T)TAGCTTGTTACGACTT    |                    |                                    |
| PCR and sequencing of QRDR for <i>C. gleum</i> |                                       |                    |                                    |
| <i>gyrA</i> -f <sup>a</sup>                    | TCGGTTATCGTTTCCAGAGC                  | 466                | This study                         |
| <i>gyrA</i> -r <sup>a</sup>                    | TGTTGGTTGCCATCCCTACT                  |                    |                                    |
| <i>gyrB</i> -f <sup>b</sup>                    | CTCTGAAGTTTCAGGGGCTGT                 | 491                | Accession no.<br>GL379781          |
| <i>gyrB</i> -r <sup>b</sup>                    | CAATATCGGCATCGGTCATG                  |                    |                                    |
| <i>parC</i> -f <sup>b</sup>                    | CTGGTTYCTKGATTATGCTTCC                | 609                |                                    |
| <i>parC</i> -r <sup>b</sup>                    | GCTCTTACTTTTCCTCCTCTGTG               |                    |                                    |

*parE-f*<sup>b</sup>

GCATTCCGTGAAGCATATG

997

*parE-r*<sup>b</sup>

TTTGTCTGTCCGGAGTGTTTT

<sup>a</sup>The conditions were as follows: an initial extended denaturation step of 94°C for 5 min, followed by 30 cycles of 30 s at 94°C, 30 s at 55°C, 1 min at 72°C, and a final 5 min at 72°C.

<sup>b</sup>The conditions were as follow: an initial extended denaturation step of 94°C for 5 min, followed by 32 cycles of 30 s at 94°C, 30 s at 50°C, 1 min at 72°C, and a final 5 min at 72°C.

**Table S2.** Virulence factors predicted using Virulence Factors Database (VFDB).

| No. | Gene Id          | Identity | E value   | Description                                                                                                                                                                  |
|-----|------------------|----------|-----------|------------------------------------------------------------------------------------------------------------------------------------------------------------------------------|
| 1   | 88296-15GL001440 | 41.53    | 7.00E-20  | (pks15) polyketide synthase PKS15 [PDIM (phthiocerol dimycocerosate) and PGL (phenolic glycolipid) biosynthesis and transport (CVF288)] [Mycobacterium tuberculosis RGTB423] |
| 2   | 88296-15GL001565 | 53.23    | 5.00E-32  | (ureG) urease/hydrogenase-associated predicted GTPase UreG [Urease (CVF221)] [Helicobacter hepaticus ATCC 51449]                                                             |
| 3   | 88296-15GL002309 | 68.72    | 3.00E-150 | (CT396) molecular chaperone DnaK [MOMP (AI392)] [Chlamydia trachomatis D/UW-3/CX]                                                                                            |
| 4   | 88296-15GL002330 | 40.88    | 8.00E-63  | (ppk) polyphosphate kinase [type IV pili (AI117)] [Dichelobacter nodosus VCS1703A]                                                                                           |
| 5   | 88296-15GL002458 | 41.56    | 1.00E-28  | (rtxB) RtxB protein [RTX toxin (CVF263)] [Vibrio cholerae O395]                                                                                                              |
| 6   | 88296-15GL002477 | 48.03    | 4.00E-74  | (hemB) Porphobilinogen synthase [Heme biosynthesis (CVF506)] [Haemophilus somnus 2336]                                                                                       |
| 7   | 88296-15GL002498 | 51.52    | 1.00E-14  | (fabZ) (3R)-hydroxymyristoyl ACP dehydratase [LPS (CVF383)] [Brucella suis 1330]                                                                                             |
| 8   | 88296-15GL002527 | 55.74    | 2.00E-115 | (capL) hypothetical protein [Capsule (CVF110)] [Staphylococcus haemolyticus JCSC1435]                                                                                        |
| 9   | 88296-15GL002535 | 46.58    | 1.00E-65  | (capK) hypothetical protein [Capsule (CVF110)] [Staphylococcus haemolyticus JCSC1435]                                                                                        |

|    |                  |       |           |                                                                                                                                              |
|----|------------------|-------|-----------|----------------------------------------------------------------------------------------------------------------------------------------------|
| 10 | 88296-15GL002537 | 66.67 | 3.00E-84  | (ABTJ_03752) UDP-N-acetylglucosamine 2-epimerase [Capsule (CVF775)]<br>[Acinetobacter baumannii MDR-TJ]                                      |
| 11 | 88296-15GL002542 | 68.73 | 2.00E-135 | (fnlA) UDP-N-acetylglucosamine 4,6-dehydratase [Capsule (CVF775)]<br>[Acinetobacter baumannii D1279779]                                      |
| 12 | 88296-15GL002544 | 49.17 | 3.00E-30  | (PSPA7_1979) imidazole glycerol phosphate synthase subunit HisF [LPS O-antigen<br>(P. aeruginosa) (CVF520)] [Pseudomonas aeruginosa PA7]     |
| 13 | 88296-15GL002545 | 44.12 | 6.00E-49  | (hisH2) glutamine amidotransferase [LPS O-antigen (P. aeruginosa) (CVF520)]<br>[Pseudomonas aeruginosa PAO1]                                 |
| 14 | 88296-15GL002558 | 41.08 | 4.00E-80  | (wbpG) LPS biosynthesis protein WbpG [LPS O-antigen (P. aeruginosa) (CVF520)]<br>[Pseudomonas aeruginosa PAO1]                               |
| 15 | 88296-15GL002559 | 52.24 | 3.00E-73  | (hisF2) imidazole glycerol phosphate synthase subunit HisF [LPS O-antigen (P.<br>aeruginosa) (CVF520)] [Pseudomonas aeruginosa PAO1]         |
| 16 | 88296-15GL002560 | 50.74 | 1.00E-59  | (hisH2) glutamine amidotransferase [LPS O-antigen (P. aeruginosa) (CVF520)]<br>[Pseudomonas aeruginosa PAO1]                                 |
| 17 | 88296-15GL002561 | 53.28 | 3.00E-26  | (A1S_0057) capsular polysaccharide synthesis enzyme [Capsule (CVF775)]<br>[Acinetobacter baumannii ATCC 17978]                               |
| 18 | 88296-15GL002565 | 53.33 | 1.00E-63  | (wbpI) probable UDP-N-acetylglucosamine 2-epimerase WbpI [LPS O-antigen (P.<br>aeruginosa) (CVF520)] [Pseudomonas aeruginosa PAO1]           |
| 19 | 88296-15GL002568 | 55.06 | 3.00E-47  | (wbpD) probable acetyltransferase WbpD [LPS O-antigen (P. aeruginosa)<br>(CVF520)] [Pseudomonas aeruginosa PAO1]                             |
| 20 | 88296-15GL002571 | 54.04 | 2.00E-46  | (wbpE) probable aminotransferase WbpE [LPS O-antigen (P. aeruginosa)<br>(CVF520)] [Pseudomonas aeruginosa PAO1]                              |
| 21 | 88296-15GL002573 | 44.87 | 1.00E-64  | (ipaH) hypothetical protein [Mxi-Spa TTSS effectors controlled by MxiE<br>(CVF465)] [Shigella flexneri 2a str. 2457T]                        |
| 22 | 88296-15GL002574 | 56.58 | 3.00E-144 | (PLES_19091) UDP-glucose/GDP-mannose dehydrogenase-like protein [LPS O-<br>antigen (P. aeruginosa) (CVF520)] [Pseudomonas aeruginosa LESB58] |
| 23 | 88296-15GL002579 | 43.94 | 7.00E-75  | (BCE_5395) capsular polysaccharide biosynthesis protein [Polysaccharide capsule                                                              |

|    |                  |       |           |                                                                                                                                                          |
|----|------------------|-------|-----------|----------------------------------------------------------------------------------------------------------------------------------------------------------|
|    |                  |       |           | (CVF567)] [ <i>Bacillus cereus</i> ATCC 10987]                                                                                                           |
| 24 | 88296-15GL002593 | 41.08 | 6.00E-31  | (aatC) ABC transporter ATP-binding protein AatC [ABC transporter for dispersin (CVF737)] [ <i>Escherichia coli</i> O78:H11:K80 str. H10407]              |
| 25 | 88296-15GL002711 | 53.15 | 1.00E-29  | (panD) aspartate 1-decarboxylase [Pantothenate synthesis (CVF305)] [ <i>Mycobacterium abscessus</i> subsp. <i>bolletii</i> str. GO 06]                   |
| 26 | 88296-15GL002736 | 43.39 | 5.00E-65  | (pdhB) pyruvate dehydrogenase E1 component beta subunit [PDH-B (CVF588)] [ <i>Mycoplasma mobile</i> 163K]                                                |
| 27 | 88296-15GL002794 | 59.79 | 6.00E-68  | (icl) isocitrate lyase [Isocitrate lyase (CVF302)] [ <i>Mycobacterium</i> sp. KMS]                                                                       |
| 28 | 88296-15GL002795 | 60.19 | 1.00E-73  | (icl) isocitrate lyase [Isocitrate lyase (CVF302)] [ <i>Mycobacterium avium</i> 104]                                                                     |
| 29 | 88296-15GL002831 | 50    | 1.00E-35  | (mgtC) hypothetical protein [Mg <sup>2+</sup> transport (CVF005)] [ <i>Salmonella enterica</i> subsp. <i>arizonae</i> serovar 62:z4,z23:-- str. RSK2980] |
| 30 | 88296-15GL002894 | 45.16 | 9.00E-24  | (ricA) Rab2 interacting conserved protein A [RicA (VF0414)] [ <i>Brucella melitensis</i> bv. 1 str. 16M]                                                 |
| 31 | 88296-15GL002919 | 44.31 | 2.00E-104 | (adeG) RND family efflux transporter [AdeFGH efflux pump/transport autoinducer (CVF773)] [ <i>Acinetobacter baumannii</i> AB0057]                        |
| 32 | 88296-15GL003039 | 49.4  | 2.00E-87  | (MG_301) glyceraldehyde-3-phosphate dehydrogenase [GAPDH (AI368)] [ <i>Mycoplasma genitalium</i> G37]                                                    |
| 33 | 88296-15GL003151 | 66.1  | 0         | (htpB) Hsp60, 60K catalase HtpB [Hsp60 (CVF347)] [ <i>Legionella pneumophila</i> str. Corby]                                                             |
| 34 | 88296-15GL003239 | 41.44 | 8.00E-71  | (msbA) lipid A export ATP-binding protein MsbA [LOS (CVF494)] [ <i>Haemophilus influenzae</i> PittGG]                                                    |
| 35 | 88296-15GL003318 | 67.18 | 5.00E-165 | (tuf) translation elongation factor Tu [EF-Tu (CVF587)] [ <i>Mycoplasma mycoides</i> subsp. <i>mycoides</i> SC str. PG1]                                 |
| 36 | 88296-15GL003400 | 58.82 | 5.00E-10  | (acpXL) acyl carrier protein [LPS (CVF383)] [ <i>Brucella melitensis</i> bv. 1 str. 16M]                                                                 |
| 37 | 88296-15GL003401 | 40.94 | 1.00E-62  | (kasB) 3-oxoacyl-(acyl carrier protein) synthase II [FAS-II (CVF300)] [ <i>Mycobacterium tuberculosis</i> RGTB327]                                       |
| 38 | 88296-15GL003497 | 41.45 | 1.00E-30  | (BCE_5392) glycosyl transferase, group 2 family protein [Polysaccharide capsule                                                                          |

|    |                  |       |           |                                                                                                                                                                                                       |
|----|------------------|-------|-----------|-------------------------------------------------------------------------------------------------------------------------------------------------------------------------------------------------------|
|    |                  |       |           | (CVF567)] [Bacillus cereus ATCC 10987]                                                                                                                                                                |
| 39 | 88296-15GL003553 | 40.83 | 2.00E-19  | (C8J_1075) hypothetical protein [LOS (CVF396)] [Campylobacter jejuni subsp. jejuni 81116]                                                                                                             |
| 40 | 88296-15GL003630 | 40.18 | 1.00E-34  | (piplc) 1-phosphatidylinositol phosphodiesterase [Phosphatidylinositol-specific phospholipase C (PI-PLC) (CVF570)] [Bacillus cereus ATCC 10987]                                                       |
| 41 | 88296-15GL003672 | 44.29 | 2.00E-49  | (rmlD) dTDP-4-dehydrorhamnose reductase [Capsular polysaccharide (CVF282)] [Vibrio vulnificus YJ016]                                                                                                  |
| 42 | 88296-15GL003678 | 43.53 | 2.00E-53  | (cpsA) undecaprenyl diphosphate synthase [Capsule (VF0361)] [Enterococcus faecalis V583]                                                                                                              |
| 43 | 88296-15GL003680 | 44.23 | 4.00E-14  | (BCE_5400) capsular exopolysaccharide family protein [Polysaccharide capsule (CVF567)] [Bacillus cereus ATCC 10987]                                                                                   |
| 44 | 88296-15GL003689 | 46.62 | 3.00E-31  | (BC5267) Glycosyltransferase [Polysaccharide capsule (CVF567)] [Bacillus cereus ATCC 14579]                                                                                                           |
| 45 | 88296-15GL003716 | 40.8  | 1.00E-31  | (ddrA) daunorubicin resistance ABC transporter ATPase subunit [PDIM (phthiocerol dimycocerosate) and PGL (phenolic glycolipid) biosynthesis and transport (CVF288)] [Mycobacterium vanbaalenii PYR-1] |
| 46 | 88296-15GL003753 | 41.53 | 2.00E-29  | (kasB) 3-oxoacyl-(acyl carrier protein) synthase II [FAS-II (CVF300)] [Mycobacterium sp. JDM601]                                                                                                      |
| 47 | 88296-15GL003754 | 42.62 | 1.00E-50  | (flmH) 3-oxoacyl-ACP reductase [Polar flagella (VF0473)] [Aeromonas hydrophila ML09-119]                                                                                                              |
| 48 | 88296-15GL003790 | 52.46 | 1.00E-140 | (katA) catalase [Catalase (CVF760)] [Neisseria lactamica 020-06]                                                                                                                                      |
| 49 | 88296-15GL003838 | 44.92 | 7.00E-54  | (qbsC) QbsC [thioquinolobactin (IA009)] [Pseudomonas fluorescens ATCC 17400]                                                                                                                          |
| 50 | 88296-15GL003913 | 64.9  | 6.00E-163 | (pgi) glucose-6-phosphate isomerase [Exopolysaccharide (CVF495)] [Haemophilus influenzae 86-028NP]                                                                                                    |
| 51 | 88296-15GL003918 | 43.84 | 2.00E-26  | (BCE_5393) UDP-galactose phosphate transferase [Polysaccharide capsule (CVF567)] [Bacillus cereus ATCC 10987]                                                                                         |
| 52 | 88296-15GL004095 | 50.64 | 3.00E-38  | (BCE_5384) NAD dependent epimerase/dehydratase family protein [Polysaccharide                                                                                                                         |

|    |                  |       |           |                                                                                                                                                      |
|----|------------------|-------|-----------|------------------------------------------------------------------------------------------------------------------------------------------------------|
|    |                  |       |           | capsule (CVF567)] [ <i>Bacillus cereus</i> ATCC 10987]                                                                                               |
| 53 | 88296-15GL004177 | 42.59 | 9.00E-23  | (lisR) two-component response regulator [LisR/LisK (CVF253)] [ <i>Listeria monocytogenes</i> EGD-e]                                                  |
| 54 | 88296-15GL004210 | 40.86 | 2.00E-55  | (hlyB) hemolysin transport protein [Hemolysin (VF0207)] [ <i>Escherichia coli</i> O157:H7 str. EDL933]                                               |
| 55 | 88296-15GL004213 | 45.35 | 3.00E-17  | (irtA) drugs-transport transmembrane ATP-binding protein ABC transporter [ABC transporter (CVF316)] [ <i>Mycobacterium tuberculosis</i> CAS/NITR204] |
| 56 | 88296-15GL004342 | 51.46 | 6.00E-63  | (flmH) 3-oxoacyl-ACP reductase [Polar flagella (VF0473)] [ <i>Aeromonas hydrophila</i> ML09-119]                                                     |
| 57 | 88296-15GL004395 | 53.92 | 3.00E-101 | (clpC) endopeptidase Clp ATP-binding chain C [ClpC (VF0072)] [ <i>Listeria monocytogenes</i> EGD-e]                                                  |
| 58 | 88296-15GL005043 | 50.64 | 4.00E-63  | (hemL) glutamate-1-semialdehyde aminotransferase [Heme biosynthesis (CVF506)] [ <i>Haemophilus somnus</i> 129PT]                                     |
| 59 | 88296-15GL005449 | 41.42 | 3.00E-24  | (farA) putative efflux pump protein [FarAB (CVF758)] [ <i>Neisseria meningitidis</i> alpha14]                                                        |
| 60 | 88296-15GL005513 | 58.82 | 1.00E-38  | (ureA) urease alpha subunit [Urease (CVF221)] [ <i>Helicobacter acinonychis</i> str. Sheeba]                                                         |
| 61 | 88296-15GL005514 | 71.25 | 1.00E-129 | (ureB) urease [Urease (CVF221)] [ <i>Helicobacter hepaticus</i> ATCC 51449]                                                                          |
| 62 | 88296-15GL005520 | 51.43 | 3.00E-12  | (ureE) urease accessory protein UreE [Urease (CVF221)] [ <i>Helicobacter pylori</i> Shi470]                                                          |
| 63 | 88296-15GL005738 | 58.23 | 4.00E-73  | (IlpA) immunogenic lipoprotein A [IlpA (VF0513)] [ <i>Vibrio vulnificus</i> YJ016]                                                                   |
| 64 | 88296-15GL006115 | 70.41 | 4.00E-29  | (evpJ) type VI secretion system protein EvpJ [EVP (E. tarda virulent protein) (SS189)] [ <i>Edwardsiella tarda</i> EIB202]                           |
| 65 | 88296-15GL006741 | 42.36 | 3.00E-62  | (clbD) putative 3-hydroxyacyl-CoA dehydrogenase [colibactin (TX033)] [ <i>Escherichia coli</i> O18:K1:H7 str. IHE3034]                               |
| 66 | 88296-15GL007198 | 44.68 | 2.00E-13  | (cap8J) capsular polysaccharide synthesis enzyme [Capsule (CVF110)] [ <i>Staphylococcus aureus</i> subsp. aureus MRSA252]                            |

|    |                  |       |          |                                                                                                                                          |
|----|------------------|-------|----------|------------------------------------------------------------------------------------------------------------------------------------------|
| 67 | 88296-15GL007227 | 55.73 | 1.00E-40 | (kpsF) arabinose-5-phosphate isomerase [LOS (CVF494)] [Haemophilus ducreyi 35000HP]                                                      |
| 68 | 88296-15GL007406 | 44.62 | 1.00E-51 | (BCAM2307) zinc metalloprotease ZmpB [ZmpB (TX176)] [Burkholderia cenocepacia J2315]                                                     |
| 69 | 88296-15GL007555 | 42.21 | 1.00E-59 | (kdsA) 2-dehydro-3-deoxyphosphooctonate aldolase [LOS (CVF494)] [Haemophilus somnus 129PT]                                               |
| 70 | 88296-15GL007576 | 42.91 | 2.00E-53 | (rpoS) RNA polymerase sigma factor RpoS [Alternative sigma factor RpoS (CVF364)] [Legionella longbeachae NSW150]                         |
| 71 | 88296-15GL007764 | 50.9  | 1.00E-94 | (dfoJ) putative decarboxylase involved in desferrioxamine biosynthesis [desferrioxamine (IA033)] [Erwinia amylovora CFBP1430]            |
| 72 | 88296-15GL007770 | 40.19 | 4.00E-64 | (dfoA) L-lysine 6-monooxygenase involved in desferrioxamine biosynthesis [desferrioxamine (IA033)] [Erwinia amylovora CFBP1430]          |
| 73 | 88296-15GL007919 | 41.98 | 1.00E-69 | (lpg0041) Dot/Icm type IV secretion system effector [Dot/Icm (VF0156)] [Legionella pneumophila subsp. pneumophila str. Philadelphia 1]   |
| 74 | 88296-15GL008018 | 46.67 | 1.00E-42 | (hisF) imidazole glycerol phosphate synthase subunit HisF [LPS (VF0171)] [Legionella pneumophila subsp. pneumophila str. Philadelphia 1] |
| 75 | 88296-15GL008021 | 41.58 | 2.00E-16 | (hisH2) glutamine amidotransferase [LPS O-antigen (P. aeruginosa) (CVF520)] [Pseudomonas aeruginosa PAO1]                                |
| 76 | 88296-15GL008105 | 41.24 | 2.00E-94 | (adeG) RND family efflux transporter [AdeFGH efflux pump/transport autoinducer (CVF773)] [Acinetobacter baumannii AB0057]                |
| 77 | 88296-15GL008325 | 52.1  | 9.00E-69 | (pilR) putative two-component system, response regulator [Type IV pili biosynthesis (CVF518)] [Pseudomonas fluorescens SBW25]            |
| 78 | 88296-15GL008449 | 47.53 | 2.00E-39 | (lirB) Dot/Icm type IV secretion system effector LirB [Dot/Icm (SS047)] [Legionella pneumophila subsp. pneumophila str. Philadelphia 1]  |
| 79 | 88296-15GL008469 | 48.57 | 8.00E-11 | (ndk) nucleoside diphosphate kinase [Nucleoside diphosphate kinase (CVF660)] [Mycobacterium smegmatis JS623]                             |
| 80 | 88296-15GL008563 | 43.62 | 8.00E-28 | (kdtB) lipopolysaccharide core biosynthesis protein [LPS (VF0056)] [Helicobacter                                                         |

|    |                  |       |          |                                                                                                                                           |
|----|------------------|-------|----------|-------------------------------------------------------------------------------------------------------------------------------------------|
| 81 | 88296-15GL008797 | 48.25 | 1.00E-35 | pylori 26695]<br>(mip) macrophage infectivity potentiator [Mip (CVF349)] [Legionella longbeachae NSW150]                                  |
| 82 | 88296-15GL008872 | 50.29 | 3.00E-41 | (panC) pantoate--beta-alanine ligase [Pantothenate synthesis (CVF305)] [Mycobacterium smegmatis str. MC2 155]                             |
| 83 | 88296-15GL009193 | 43.64 | 9.00E-22 | (mgtC) hypothetical protein [Mg <sup>2+</sup> transport (CVF005)] [Salmonella enterica subsp. arizonae serovar 62:z4,z23:-- str. RSK2980] |

**Table S3.** Genes associated with antibiotic resistance predicted using Antibiotic Resistance Genes Database (ARDB).

| No. | Gene Id          | Identity | E value   | Resistance Type | Antibiotic Resistance                                              | Description                                                                                                                                   |
|-----|------------------|----------|-----------|-----------------|--------------------------------------------------------------------|-----------------------------------------------------------------------------------------------------------------------------------------------|
| 1   | 88296-15GL002550 | 45.92    | 4.00E-17  | catb3           | chloramphenicol                                                    | Group B chloramphenicol acetyltransferase, which can inactivate chloramphenicol. Also referred to as xenobiotic acetyltransferase.            |
| 2   | 88296-15GL002919 | 44.33    | 2.00E-121 | acrb            | aminoglycoside, glycylicycline, macrolide, beta-lactam, acriflavin | Resistance-nodulation-cell division transporter system. Multidrug resistance efflux pump.                                                     |
| 3   | 88296-15GL002920 | 40.24    | 3.00E-106 | ceob            | chloramphenicol                                                    | Resistance-nodulation-cell division transporter system. Multidrug resistance efflux pump.                                                     |
| 4   | 88296-15GL003399 | 75       | 1.00E-62  | catb3           | chloramphenicol                                                    | Group B chloramphenicol acetyltransferase, which can inactivate chloramphenicol. Also referred to as xenobiotic acetyltransferase.            |
| 5   | 88296-15GL003716 | 41.57    | 9.00E-25  | bcra            | bacitracin                                                         | ABC transporter system, bacitracin efflux pump.                                                                                               |
| 6   | 88296-15GL004177 | 41.54    | 7.00E-26  | vanre           | vancomycin                                                         | VanE type vancomycin resistance operon genes, which can synthesize peptidoglycan with modified C-terminal D-Ala-D-Ala to D-alanine--D-serine. |



|    |                  |       |           |         |                                  |                                                                                                                                               |
|----|------------------|-------|-----------|---------|----------------------------------|-----------------------------------------------------------------------------------------------------------------------------------------------|
| 7  | 88296-15GL006031 | 46.6  | 5.00E-42  | bl2_veb | cephalosporin, penicillin        | Class A beta-lactamase. This enzyme breaks the beta-lactam antibiotic ring open and deactivates the molecule's antibacterial properties.      |
| 8  | 88296-15GL006890 | 52.29 | 1.00E-26  | emre    | aminoglycoside                   | Multidrug resistance efflux pump.                                                                                                             |
| 9  | 88296-15GL007471 | 51.8  | 2.00E-33  | bl2_veb | cephalosporin, penicillin        | Class A beta-lactamase. This enzyme breaks the beta-lactam antibiotic ring open and deactivates the molecule's antibacterial properties.      |
| 10 | 88296-15GL008105 | 42.38 | 4.00E-104 | mexf    | chloramphenicol, fluoroquinolone | Resistance-nodulation-cell division transporter system. Multidrug resistance efflux pump.                                                     |
| 11 | 88296-15GL008343 | 43.52 | 9.00E-16  | ykkd    | na_antimicrobials                | Small Multidrug Resistance (SMR) protein family. Multidrug resistance efflux pump, which consists of two proteins.                            |
| 12 | 88296-15GL008565 | 43.64 | 1.00E-28  | vang    | vancomycin                       | VanG type vancomycin resistance operon genes, which can synthesize peptidoglycan with modified C-terminal D-Ala-D-Ala to D-alanine--D-serine. |

**Table S4.** Genes associated with antibiotic resistance predicted using Comprehensive Antibiotic Resistance Database (CARD).

| No. | Gene Id          | Identity | E value   | Classification                                                                                                | Definition of Term                                                                                                                                                                                                                                                       |
|-----|------------------|----------|-----------|---------------------------------------------------------------------------------------------------------------|--------------------------------------------------------------------------------------------------------------------------------------------------------------------------------------------------------------------------------------------------------------------------|
| 1   | 88296-15GL002035 | 63.26    | 1.00E-102 | antibiotic target mechanism of antibiotic resistance determinant of antibiotic resistance antibiotic molecule | Point mutations in the thymidylate synthetase thyA gene shown clinically to confer resistance to para-aminosalicylic acid. Loss-of-function mutations in thyA disrupt the catalytic activity and substrate-binding affinity, thus conferring resistance. [PMID:25421465] |
| 2   | 88296-15GL002550 | 45.92    | 3.00E-17  | mechanism of antibiotic resistance determinant of antibiotic resistance antibiotic molecule                   | catB8 is a plasmid or integron-encoded variant of the cat gene found in Klebsiella pneumoniae, Salmonella typhi and Pseudomonas aeruginosa [PMID:12760886]                                                                                                               |

|    |                  |       |           |                                                                                                               |                                                                                                                                                                                                                                                                  |
|----|------------------|-------|-----------|---------------------------------------------------------------------------------------------------------------|------------------------------------------------------------------------------------------------------------------------------------------------------------------------------------------------------------------------------------------------------------------|
| 3  | 88296-15GL002919 | 43.84 | 2.00E-122 | mechanism of antibiotic resistance determinant of antibiotic resistance antibiotic molecule                   | CmeB is the inner membrane transporter the CmeABC multidrug efflux complex. [PMID:15728904]                                                                                                                                                                      |
| 4  | 88296-15GL002994 | 42.73 | 1.00E-127 | mechanism of antibiotic resistance determinant of antibiotic resistance antibiotic molecule                   | Pleuromutilin (Tiamulin) ABC efflux pump found in <i>Paenibacillus</i> sp. LC231, a strain of <i>Paenibacillus</i> isolated from Lechuguilla Cave, NM, USA. Confers resistance to pleuromutilin antibiotics. Described by Pawlowski et al. 2016. [PMID:27929110] |
| 5  | 88296-15GL003296 | 50.13 | 0         | antibiotic target mechanism of antibiotic resistance determinant of antibiotic resistance antibiotic molecule | Point mutations that occurs in <i>Staphylococcus aureus</i> rpoC resulting in resistance to daptomycin [PMID:16723576]                                                                                                                                           |
| 6  | 88296-15GL003298 | 45.87 | 0         | antibiotic target mechanism of antibiotic resistance determinant of antibiotic resistance antibiotic molecule | Point mutations that occurs in <i>Escherichia coli</i> rpoB resulting in resistance to rifampicin [PMID:3050121]                                                                                                                                                 |
| 7  | 88296-15GL003318 | 69.47 | 2.00E-159 | antibiotic target mechanism of antibiotic resistance determinant of antibiotic resistance antibiotic molecule | Sequence variants of <i>Enterococcus faecium</i> elongation factor Tu that confer resistance to GE2270A [PMID:7989561]                                                                                                                                           |
| 8  | 88296-15GL003327 | 41.26 | 1.00E-39  | mechanism of antibiotic resistance determinant of antibiotic resistance antibiotic molecule                   | ArlR is a response regulator that binds to the norA promoter to activate expression. ArlR must first be phosphorylated by ArlS. [PMID:10633099]                                                                                                                  |
| 9  | 88296-15GL003399 | 78.57 | 6.00E-57  | mechanism of antibiotic resistance determinant of antibiotic resistance antibiotic molecule                   | catB8 is a plasmid or integron-encoded variant of the cat gene found in <i>Klebsiella pneumoniae</i> , <i>Salmonella typhi</i> and <i>Pseudomonas aeruginosa</i> [PMID:12760886]                                                                                 |
| 10 | 88296-           | 40.94 | 6.00E-64  | antibiotic target mechanism of                                                                                | Specific mutations on the <i>Mycobacterium tuberculosis</i>                                                                                                                                                                                                      |

|    |                  |       |          |                                                                                                                                                                                                              |                                                                                                                                                                                                                                                                                                                                                                                                                                                                |
|----|------------------|-------|----------|--------------------------------------------------------------------------------------------------------------------------------------------------------------------------------------------------------------|----------------------------------------------------------------------------------------------------------------------------------------------------------------------------------------------------------------------------------------------------------------------------------------------------------------------------------------------------------------------------------------------------------------------------------------------------------------|
|    | 15GL003401       |       |          | antibiotic resistance determinant of antibiotic resistance antibiotic molecule                                                                                                                               | kasA gene resulting in lowered affinity of isoniazid, resulting in resistance [PMID:10428945, PMID:9616124]                                                                                                                                                                                                                                                                                                                                                    |
| 11 | 88296-15GL003716 | 41.57 | 6.00E-25 | mechanism of antibiotic resistance determinant of antibiotic resistance antibiotic molecule<br>antibiotic target mechanism of antibiotic resistance determinant of antibiotic resistance antibiotic molecule | bcrA is an ABC transporter found in <i>Bacillus licheniformis</i> that confers bacitracin resistance [PMID:7476193]<br>fabG is a 3-oxoacyl-acyl carrier protein reductase involved in lipid metabolism and fatty acid biosynthesis. The bacterial biocide Triclosan blocks the final reduction step in fatty acid elongation, inhibiting biosynthesis. Point mutations in fabG can confer resistance to Triclosan. [PMID:27577999]                             |
| 12 | 88296-15GL003754 | 45.08 | 2.00E-54 | mechanism of antibiotic resistance determinant of antibiotic resistance antibiotic molecule                                                                                                                  | ArlR is a response regulator that binds to the norA promoter to activate expression. ArlR must first be phosphorylated by ArlS. [PMID:10633099]<br>fabG is a 3-oxoacyl-acyl carrier protein reductase involved in lipid metabolism and fatty acid biosynthesis. The bacterial biocide Triclosan blocks the final reduction step in fatty acid elongation, inhibiting biosynthesis. Point mutations in fabG can confer resistance to Triclosan. [PMID:27577999] |
| 13 | 88296-15GL004177 | 40.83 | 2.00E-26 | mechanism of antibiotic resistance determinant of antibiotic resistance antibiotic molecule<br>antibiotic target mechanism of antibiotic resistance determinant of antibiotic resistance antibiotic molecule | ArlR is a response regulator that binds to the norA promoter to activate expression. ArlR must first be phosphorylated by ArlS. [PMID:10633099]<br>fabG is a 3-oxoacyl-acyl carrier protein reductase involved in lipid metabolism and fatty acid biosynthesis. The bacterial biocide Triclosan blocks the final reduction step in fatty acid elongation, inhibiting biosynthesis. Point mutations in fabG can confer resistance to Triclosan. [PMID:27577999] |
| 14 | 88296-15GL004342 | 52.07 | 7.00E-66 | antibiotic target mechanism of antibiotic resistance determinant of antibiotic resistance antibiotic molecule                                                                                                | dfrE is a chromosome-encoded dihydrofolate reductase found in <i>Enterococcus faecalis</i> [PMID:9869579]                                                                                                                                                                                                                                                                                                                                                      |
| 15 | 88296-15GL005088 | 72.29 | 4.00E-33 | mechanism of antibiotic resistance determinant of antibiotic resistance antibiotic molecule                                                                                                                  | farA is the membrane fusion protein that is part of the farAB efflux pump. [PMID:10447892]                                                                                                                                                                                                                                                                                                                                                                     |
| 16 | 88296-15GL005449 | 42.01 | 2.00E-25 | mechanism of antibiotic resistance determinant of antibiotic resistance antibiotic molecule                                                                                                                  |                                                                                                                                                                                                                                                                                                                                                                                                                                                                |

|    |                  |       |           |                                                                                                                                         |                                                                                                                                                                                                                                                                                                                                    |
|----|------------------|-------|-----------|-----------------------------------------------------------------------------------------------------------------------------------------|------------------------------------------------------------------------------------------------------------------------------------------------------------------------------------------------------------------------------------------------------------------------------------------------------------------------------------|
| 17 | 88296-15GL006031 | 46.07 | 2.00E-46  | resistance antibiotic molecule<br>mechanism of antibiotic<br>resistance determinant of antibiotic<br>resistance antibiotic molecule     | TLA-1 is a beta-lactamase found in plasmids of clinical isolates of <i>Escherichia coli</i> strain R170 in Latin America. It preferentially hydrolyzed cephaloridine, cefotaxime, cephalothin, benzylpenicillin, and ceftazidime. The enzyme was markedly inhibited by sulbactam, tazobactam, and clavulanic acid. [PMID:15095209] |
| 18 | 88296-15GL006890 | 59.26 | 4.00E-30  | mechanism of antibiotic<br>resistance determinant of antibiotic<br>resistance                                                           | AbeS in an efflux pump of the SMR family of transporters found in <i>Acinetobacter baumannii</i> . [PMID:19770280]                                                                                                                                                                                                                 |
| 19 | 88296-15GL007254 | 40    | 1.00E-13  | mechanism of antibiotic<br>resistance determinant of antibiotic<br>resistance antibiotic molecule                                       | arr-1 is a chromosome-encoded ribosyltransferase found in <i>Mycobacterium smegmatis</i> [PMID:9371349]                                                                                                                                                                                                                            |
| 20 | 88296-15GL007471 | 50.74 | 5.00E-40  | mechanism of antibiotic<br>resistance determinant of antibiotic<br>resistance antibiotic molecule                                       | TLA-1 is a beta-lactamase found in plasmids of clinical isolates of <i>Escherichia coli</i> strain R170 in Latin America. It preferentially hydrolyzed cephaloridine, cefotaxime, cephalothin, benzylpenicillin, and ceftazidime. The enzyme was markedly inhibited by sulbactam, tazobactam, and clavulanic acid. [PMID:15095209] |
| 21 | 88296-15GL007491 | 66.78 | 0         | antibiotic target mechanism of<br>antibiotic resistance determinant of<br>antibiotic resistance antibiotic<br>molecule                  | Point mutation in <i>Capnocytophaga gingivalis</i> that decreases binding affinity of fluoroquinolone antibiotics to <i>gyrA</i> , thereby conferring resistance. [PMID:27531625]                                                                                                                                                  |
| 22 | 88296-15GL008105 | 41.96 | 7.00E-104 | inhibitor of antibiotic<br>resistance mechanism of antibiotic<br>resistance determinant of antibiotic<br>resistance antibiotic molecule | MexB is the inner membrane multidrug exporter of the efflux complex MexAB-OprM. [PMID:19361527, PMID:20583998, PMID:21178960, PMID:14973037]                                                                                                                                                                                       |

|    |                  |       |          |                                                                                                               |                                                                                                                                                                                                                                    |
|----|------------------|-------|----------|---------------------------------------------------------------------------------------------------------------|------------------------------------------------------------------------------------------------------------------------------------------------------------------------------------------------------------------------------------|
| 23 | 88296-15GL008343 | 43.52 | 6.00E-16 | mechanism of antibiotic resistance determinant of antibiotic resistance antibiotic molecule                   | ykkD is an SMR-type protein that is a subunit of the ykkCD efflux pump [PMID:10735877]                                                                                                                                             |
| 24 | 88296-15GL008557 | 41.36 | 5.00E-37 | antibiotic target mechanism of antibiotic resistance determinant of antibiotic resistance antibiotic molecule | dfrA3 is an integron-encoded dihydrofolate reductase found in <i>Escherichia coli</i> [PMID:20169085]                                                                                                                              |
| 25 | 88296-15GL008565 | 43.64 | 7.00E-29 | mechanism of antibiotic resistance determinant of antibiotic resistance antibiotic molecule                   | VanG is a D-Ala-D-Ala ligase homolog that can synthesize D-Ala-D-Ser, an alternative substrate for peptidoglycan synthesis that reduces vancomycin binding affinity in <i>Enterococcus faecalis</i> [PMID:16323116, PMID:12426332] |

---

## Reference

1. Hantsis-Zacharov E, Shakéd T, Senderovich Y, Halpern M. 2008. *Chryseobacterium oranimense* sp. nov., a psychrotolerant, proteolytic and lipolytic bacterium isolated from raw cow's milk. *Int J Syst Evol Microbiol* 58:2635–2639.
